**S1 Table. Standardized Measurement Error Parameter Estimates for Item Study Measures****(N = 3010).**

| Construct                                   | Factor Loading | Measurement Error |
|---------------------------------------------|----------------|-------------------|
| Wave 1 Self-rated Health                    |                |                   |
| Item 1: Rate your overall health at present | .744           | .014              |
| Item 2: Compared to most people your age    | .577           | .008              |
| Number of Chronic Illnesses                 | .434           | .059              |
| Wave 1 R/S Engagement                       |                |                   |
| Religious Identity                          | .632           | .006              |
| Frequency of Prayer                         | .729           | .083              |
| Religious Service Attendance                | .536           | .119              |
| Religious Commitment                        | .609           | .024              |
| Benevolent R/S Coping                       | .646           | .065              |
| Seeking God's Social Support                | .795           | .057              |
| Wave 2 Self-rated Health                    |                |                   |
| Item 1: Rate your overall health at present | .801           | .014              |
| Item 2: Compared to most people your age    | .662           | .008              |
| Number of Chronic Illnesses                 | .523           | .107              |
| Wave 2 R/S Engagement                       |                |                   |
| Religious Identity                          | .735           | .006              |
| Frequency of Prayer                         | .816           | .083              |
| Religious Service Attendance                | .634           | .119              |
| Religious Commitment                        | .717           | .024              |
| Benevolent R/S Coping                       | .757           | .065              |
| Seeking God's Social Support                | .871           | .057              |

Factor loadings and measurement error terms are from the completely standardized solution, and are significant at the  $p < .001$  level. The measurement error term for Number of Chronic Illnesses across time points was allowed to vary.
